# Supplementary material
Source: publisher figshare collection journal article supplement (https://acs.figshare.com/ndownloader/files/4058218)
Supplement: Supplementary file 1 [file 4058218]

Supporting Information for the article entitled

# “Effective Solubilization of Single-Walled Carbon Nanotubes in THF Using PEGylated Corannulene Dispersant”

*Baris Yilmaz,<sup>a</sup> Josiah Bjorgaard,<sup>a</sup> Christopher L. Colbert,<sup>a</sup> Jay S. Siegel,<sup>b</sup> and Muhammet E. Köse<sup>\*c</sup>*

<sup>a</sup> Department of Chemistry and Biochemistry, North Dakota State University, Fargo, North Dakota, 58108, USA

<sup>b</sup> Organic Chemistry Institute, University of Zurich, Winterthurerstrasse 190, 8057 Zurich, Switzerland

<sup>c</sup> TUBITAK National Metrology Institute, Gebze, Kocaeli, 41470 Turkey

\* Corresponding author. Email: [erkan.kose@tubitak.gov.tr](mailto:erkan.kose@tubitak.gov.tr)

## Density Functional Theory Calculations with Dispersion Corrected Functional

Accurate simulation of adsorbed species on SWNTs using DFT requires the use of empirical dispersion corrected functionals. The  $\omega$ B97X-D functional used in this study has been found to provide binding energies close to MP2 benchmark calculations for polyaromatic hydrocarbons adsorbed on Boron-Nitride nanotubes.<sup>1</sup> This empirical dispersion correction has been applied to a number of popular functionals, providing results close to benchmark MP2 or CCSD(T) calculations.<sup>2</sup> Similarly, it has provided results in excellent agreement with experiment for polyaromatic hydrocarbons adsorbed on graphene with 6-31G\* basis set.<sup>3</sup>

SWNTs were constructed using C-C bond lengths of 1.421Å. Geometry optimization of the adsorbed species on SWNTs was carried out at the  $\omega$ B97X-D/6-31G\* level of theory while nanotube coordinates held fixed. The binding energy was calculated according to

$$U_b = E_A + E_{\text{CNT}} - E_{\text{A-CNT}} \quad (1)$$

where  $U_b$  is the binding energy,  $E_A$  is the total energy of adsorbate optimized at the  $\omega$ B97X-D/6-31G\* level of theory,  $E_{\text{CNT}}$  is the total energy of the SWNT from a single-point calculation, and  $E_{\text{A-CNT}}$  is the total energy of the optimized SWNT-adsorbate complex. Counterpoise correction was applied to account for basis set superposition error (BSSE).

1. Y. Zhao, X. Wu, J. Yang and X. Cheng Zeng, *Physical Chemistry Chemical Physics*, 2011, **13**, 11766-11772.
2. S. Grimme, *Journal of computational chemistry*, 2006, **27**, 1787-1799.
3. O. V. Ershova, T. C. Lillestolen and E. Bichoutskaia, *Physical Chemistry Chemical Physics*, 2010, **12**, 6483-6491.

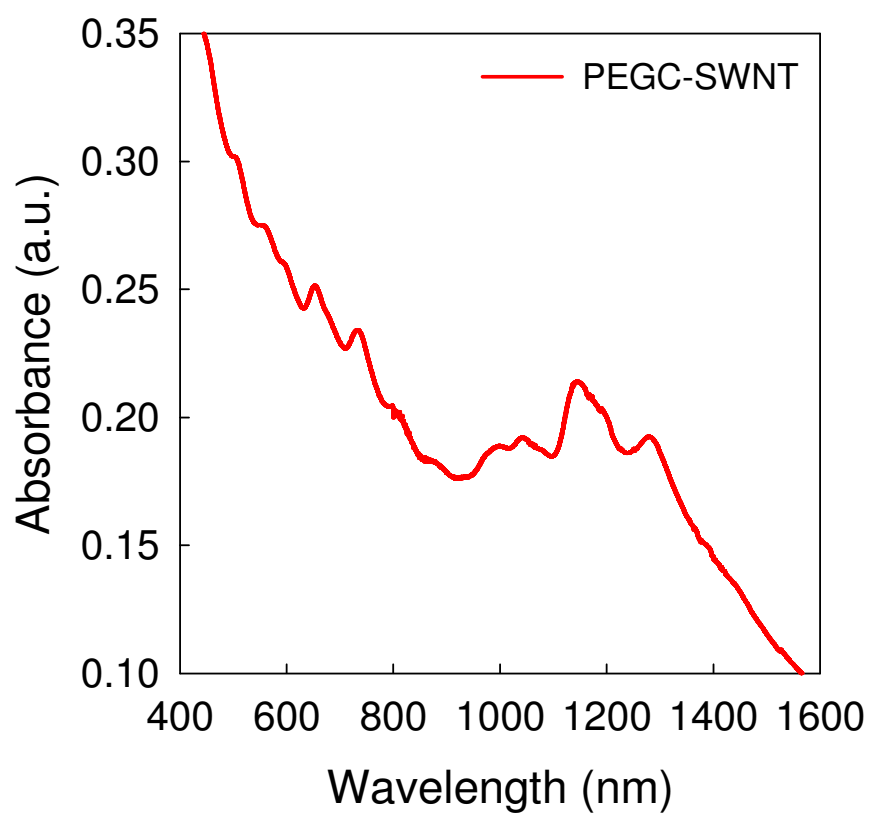

**Figure S1.** PEGC-SWNT absorption between 400 and 1600 nm.

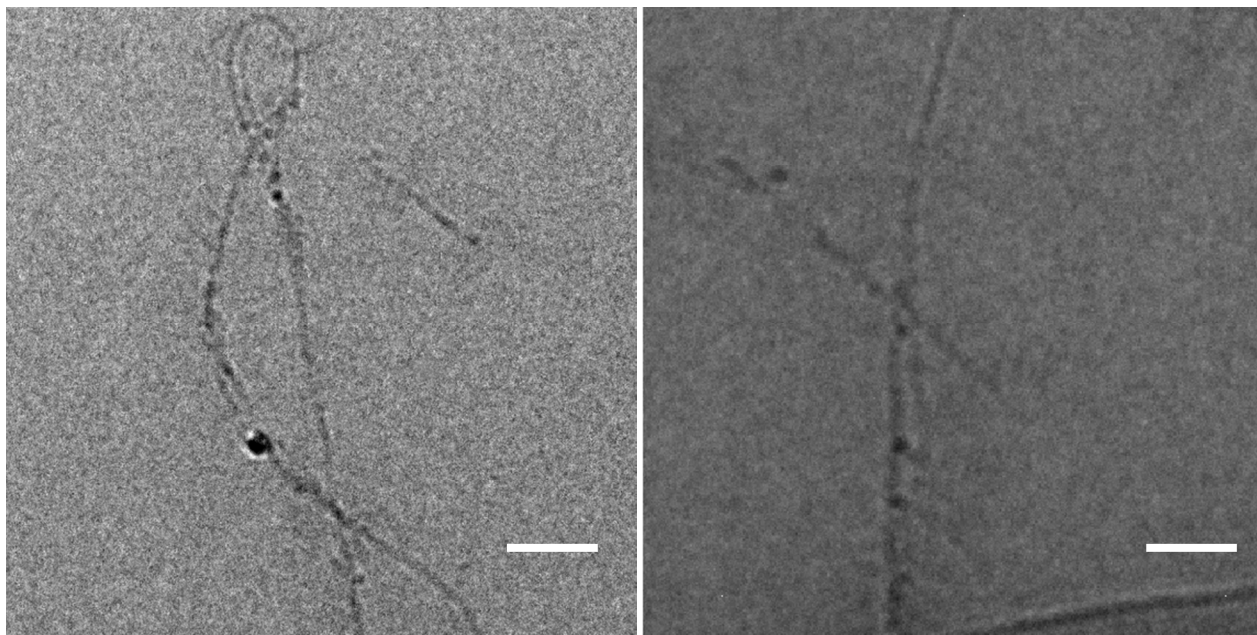

**Figure S2.** Sample transmission electron microscope (TEM) images prepared from dilute solution of PEGC-SWNT sample. Some circular features are present on nanotube surfaces. These features can be attributed to adsorbed PEGC molecules. Dark spots could be a result of aggregation of PEGC on SWNT surface upon drying during sample preparation. TEM images were collected with JEOL JEM-100 CX II transmission electron microscope. The scale bar corresponds to 100 nm.

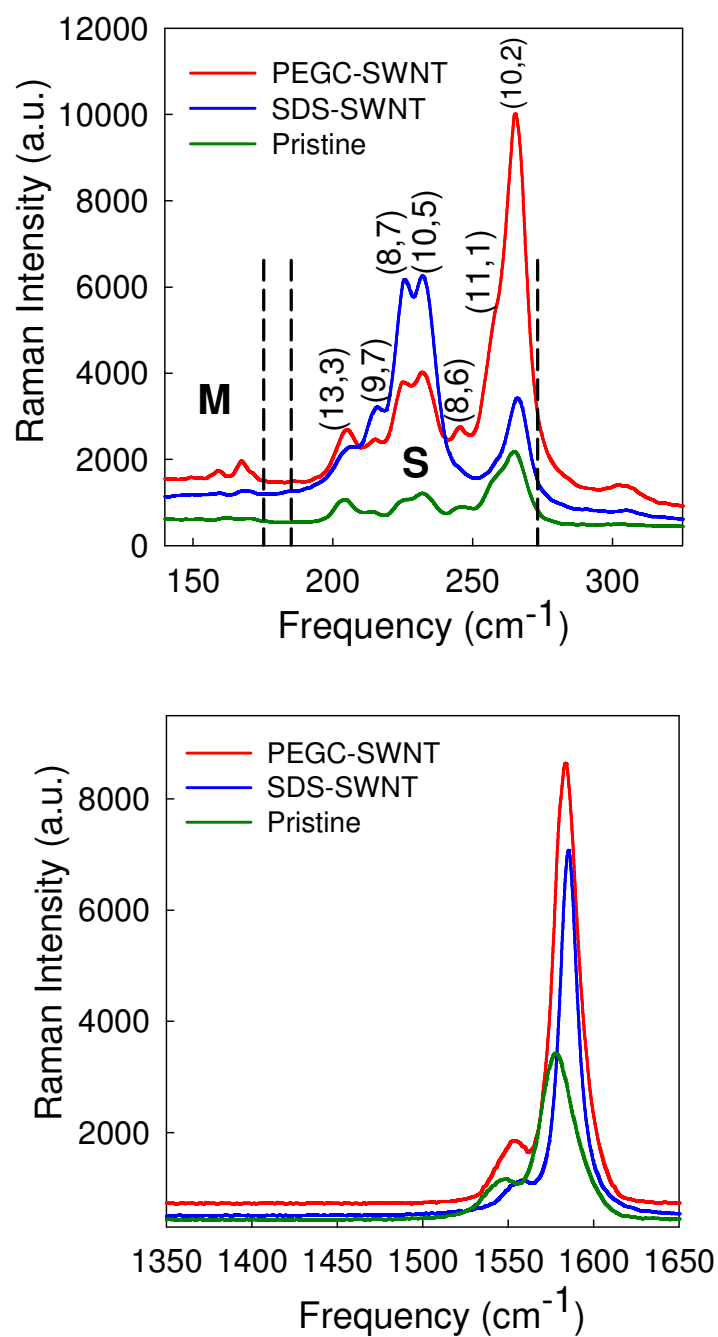

**Figure S3.** Raman spectra obtained for PEGC-SWNT, SDS-SWNT, and pristine samples with a 785 nm excitation laser line.
